# Supplementary material for: Structure–activity relationship analysis of a series of nonsteroidal analogues as androgen receptor antagonists
Source: Royal Society of Chemistry journal article supplement (doi:10.1039/d0nj04204h), 2020-11-17
Supplement: d0nj04204h1.pdf [file d0nj04204h1.pdf]

Electronic Supplementary Material (ESI) for New Journal of Chemistry.  
This journal is © The Royal Society of Chemistry and Centre National de la Recherche Scientifique 2020

### **Electronic Supplementary Information (ESI)**

#### **Structure–activity relationship analysis of a series of nonsteroidal analogues as androgen receptor antagonists**

Miao Yuan, Ping Cheng \* and Shuping Zhang \*

College of Science, University of Shanghai for Science and Technology, Shanghai,  
200093, P.R. China.

\*Corresponding Authors.

E-mail: chengp@usst.edu.cn (P.C.); zhang\_lucy9999@vip.126.com (S.Z.)

Journal to be published: ***New Journal of Chemistry*** (Manuscript ID NJ-ART-08-2020-  
**004204**)

**Table S1.** The designed new molecules based on the constructed 3D-QSAR models.

| ID          | Structure                                                                           | Predicted $pIC_{50}$ |        |
|-------------|-------------------------------------------------------------------------------------|----------------------|--------|
|             |                                                                                     | CoMFA                | CoMSIA |
| 01*<br>(D1) | 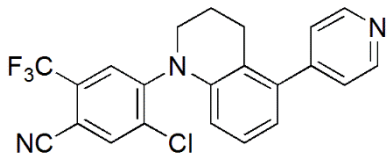   | 7.198                | 7.211  |
| 02*<br>(D2) |    | 7.237                | 7.214  |
| 03*<br>(D3) |    | 7.250                | 7.240  |
| 04          |   | 6.878                | 7.021  |
| 05          |  | 6.958                | 7.061  |
| 06          |  | 7.146                | 7.259  |
| 07          |  | 7.025                | 7.135  |
| 08          |  | 6.753                | 7.005  |
| 09          |  | 6.937                | 7.075  |

|    |                                                                                     |       |       |
|----|-------------------------------------------------------------------------------------|-------|-------|
| 10 | 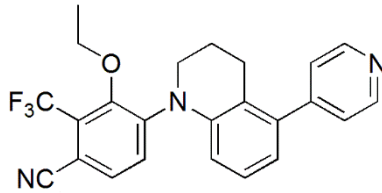   | 6.928 | 7.069 |
| 11 |    | 7.094 | 7.155 |
| 12 |    | 6.624 | 6.748 |
| 13 |   | 6.961 | 7.003 |
| 14 |  | 6.951 | 6.995 |
| 15 |  | 6.870 | 7.003 |
| 16 |  | 6.950 | 6.865 |
| 17 |  | 7.108 | 7.024 |
| 18 |  | 7.051 | 7.023 |

|             |                                                                                     |       |       |
|-------------|-------------------------------------------------------------------------------------|-------|-------|
| 19          | 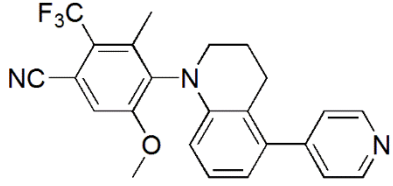   | 7.152 | 7.210 |
| 20          |    | 6.856 | 7.076 |
| 21          |    | 7.028 | 7.111 |
| 22          |    | 7.021 | 7.109 |
| 23          |  | 7.173 | 7.158 |
| 24*<br>(D4) |  | 7.222 | 7.197 |
| 25*<br>(D5) |  | 7.168 | 7.228 |
| 26          |  | 7.152 | 7.244 |
| 27          |  | 7.017 | 7.189 |

|    |  |       |       |
|----|--|-------|-------|
| 28 |  | 7.007 | 7.178 |
| 29 |  | 7.048 | 7.175 |
| 30 |  | 7.096 | 7.212 |
| 31 |  | 7.027 | 7.261 |
| 32 |  | 7.017 | 7.250 |
| 33 |  | 7.050 | 7.246 |
| 34 |  | 7.137 | 7.227 |
| 35 |  | 7.144 | 7.134 |
| 36 |  | 7.098 | 6.950 |
| 37 |  | 7.073 | 7.092 |

|             |  |       |       |
|-------------|--|-------|-------|
| 38          |  | 6.874 | 7.139 |
| 39          |  | 6.848 | 7.001 |
| 40          |  | 6.809 | 7.022 |
| 41          |  | 6.808 | 6.890 |
| 42          |  | 7.021 | 7.170 |
| 43          |  | 6.806 | 7.136 |
| 44          |  | 6.977 | 6.992 |
| 45*<br>(D8) |  | 7.191 | 7.334 |
| 46          |  | 7.066 | 7.332 |
| 47          |  | 6.858 | 7.300 |

|             |                                                                                     |       |       |
|-------------|-------------------------------------------------------------------------------------|-------|-------|
| 48          | 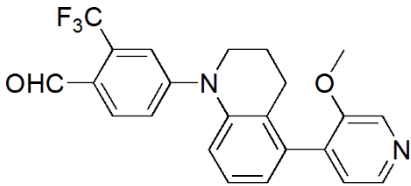   | 7.026 | 7.155 |
| 49          |    | 6.923 | 7.223 |
| 50          |    | 6.881 | 6.792 |
| 51          |    | 7.143 | 7.207 |
| 52*<br>(D6) |   | 7.268 | 7.273 |
| 53*<br>(D7) |  | 7.285 | 7.309 |
| 54          |  | 7.067 | 7.037 |
| 55          |  | 7.107 | 6.955 |
| 56          |  | 7.148 | 7.263 |

|              |  |       |       |
|--------------|--|-------|-------|
| 57           |  | 7.174 | 7.157 |
| 58           |  | 7.199 | 7.164 |
| 59*<br>(D9)  |  | 7.264 | 7.405 |
| 60*<br>(D10) |  | 7.324 | 7.422 |

\*Selected novel compounds.
